# Supplementary material for: Phase stability of intercalated V2O5 battery cathodes elucidated through the Goldschmidt tolerance factor
Source: Royal Society of Chemistry journal article supplement (doi:10.1039/c9cp00170k), 2019-01-01
Supplement: c9cp00170k1.pdf [file c9cp00170k1.pdf]

# Supporting Information: Phase stability of intercalated $V_2O_5$ battery cathodes elucidated through the Goldschmidt tolerance factor

Kit McColl<sup>1</sup> and Furio Corà<sup>1</sup>

<sup>1</sup>Department of Chemistry, University College London, 20 Gordon Street,  
London, WC1H 0AJ, United Kingdom

February 7, 2019

## Contents

|          |                                                                              |          |
|----------|------------------------------------------------------------------------------|----------|
| <b>1</b> | <b>Constrained geometry optimisations</b>                                    | <b>2</b> |
| <b>2</b> | <b>Magnetic ordering of <math>V^{4+}</math> ions in <math>MV_2O_5</math></b> | <b>4</b> |
| <b>3</b> | <b>Structural properties of <math>MV_2O_5</math> phases</b>                  | <b>6</b> |

# 1 Constrained geometry optimisations

Our calculations on ionic migration and layer translation have been performed using constrained geometry optimisations. Constrained optimisations may over-estimate activation barriers compared to techniques such as nudged elastic-band (NEB) calculations in some cases where reaction steps involve a change of more than one geometric coordinate. However, this is not expected to be an issue for ionic migration in  $\alpha$ - and  $\delta$ - $V_2O_5$ , in both of which the migration pathway consists of an elementary reaction step, with a highly symmetric profile.<sup>1-3</sup>

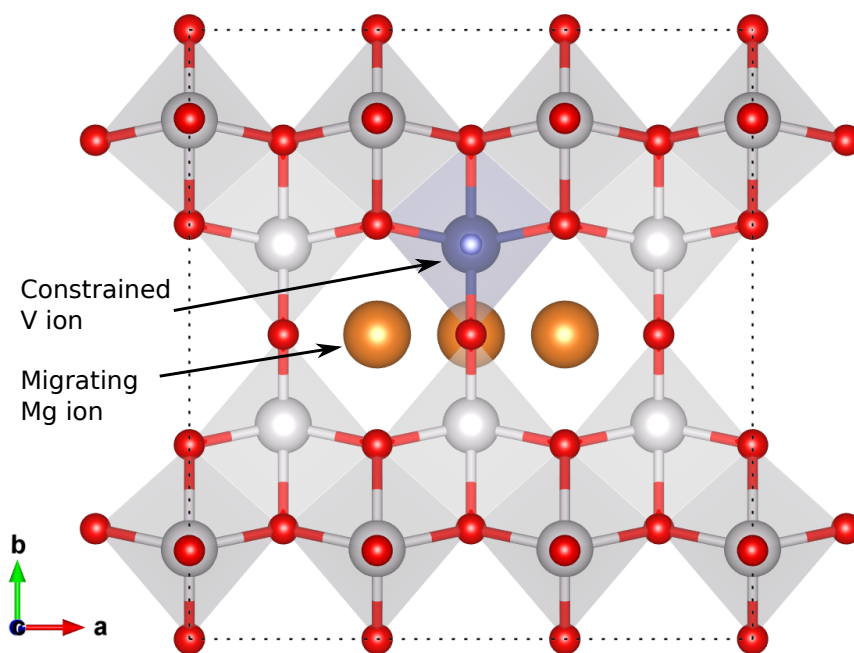

Figure S1: Details of constrained geometry optimisations to determine Mg migration barrier in  $\alpha$ - $V_2O_5$ . The V ion indicated in blue was constrained during the optimisation, along with the  $a$  coordinate of the migrating Mg ion.

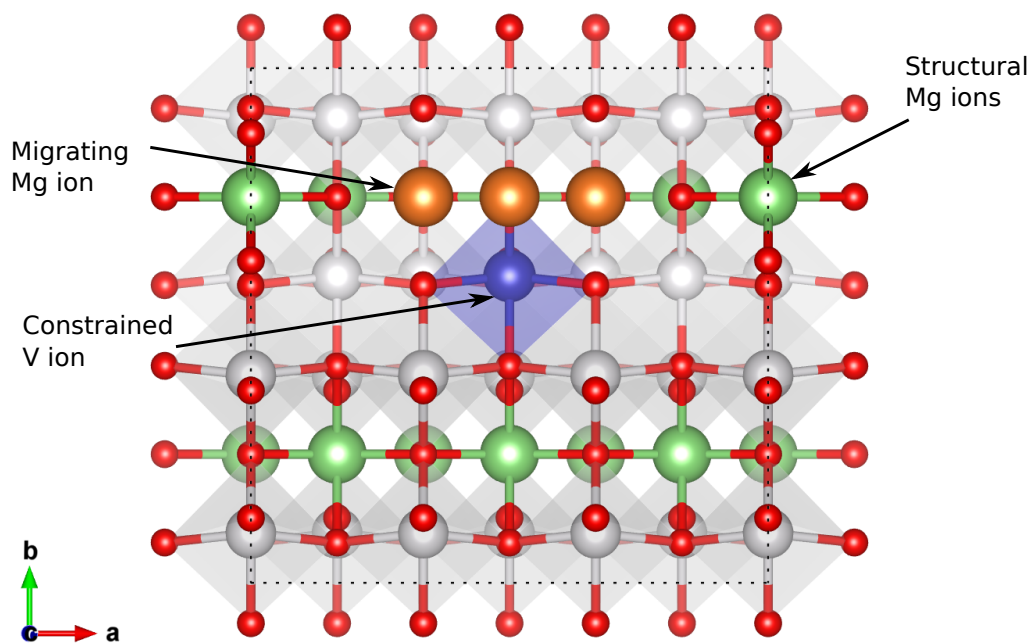

Figure S2: Details of constrained geometry optimisations to determine Mg migration barrier in  $\delta$ - $\text{MgV}_2\text{O}_5$ . The V ion indicated in blue was constrained during the optimisation, along with the  $a$  coordinate of the migrating Mg ion. The structural Mg ions are shown here in green, with the migrating Mg ion shown in orange.

## 2 Magnetic ordering of $V^{4+}$ ions in $MV_2O_5$

The  $d^1$  electrons on  $V^{4+}$  ions in  $MV_2O_5$  may be aligned in either a ferromagnetic (FM) or antiferromagnetic (AFM) order. Here we consider 3 possible AFM configurations, identified previously as being the lowest energy orderings.<sup>4</sup> The energy difference between magnetic orderings is always  $<50$  meV/f.u., and will not contribute significantly to the relative stability of  $\alpha$  vs.  $\delta$  for each  $MV_2O_5$  phase. For computational ease, we therefore selected FM orderings for all cases in systems containing  $d^1$  electrons.

Table S1: Energetics and structural properties of different magnetic orderings of  $\alpha$ - $MgV_2O_5$ . Values in brackets indicate the difference respect to the calculated lattice parameters for the FM case

| $\alpha$ - $MgV_2O_5$ | $\Delta E$ (eV/f.u.) | a (Å)           | b (Å)            | c (Å)           |
|-----------------------|----------------------|-----------------|------------------|-----------------|
| FM                    | 0.000                | 3.4313          | 11.1978          | 4.7093          |
| AFM1                  | -0.034               | 3.4391 ( 0.2 %) | 11.2045 ( 0.1 %) | 4.7030 (-0.1 %) |
| AFM2                  | -0.015               | 3.4363 ( 0.1 %) | 11.1900 (-0.1 %) | 4.7003 (-0.2 %) |
| AFM3                  | -0.011               | 3.4312 ( 0.0 %) | 11.2086 ( 0.1 %) | 4.7078 ( 0.0 %) |

Table S2: Energetics and structural properties of different magnetic orderings of  $\delta$ - $MgV_2O_5$ . Values in brackets indicate the difference respect to the calculated lattice parameters for the FM case

| $\delta$ - $MgV_2O_5$ | $\Delta E$ (eV/f.u.) | a (Å)           | b (Å)           | c (Å)            |
|-----------------------|----------------------|-----------------|-----------------|------------------|
| FM                    | 0.000                | 3.6673          | 9.9088          | 10.9417          |
| AFM1                  | -0.021               | 3.6658 ( 0.0 %) | 9.8933 (-0.2 %) | 10.9531 ( 0.1 %) |
| AFM2                  | -0.005               | 3.6715 ( 0.1 %) | 9.8976 (-0.1 %) | 10.9375 ( 0.0 %) |
| AFM3                  | -0.016               | 3.6656 ( 0.0 %) | 9.8996 (-0.1 %) | 10.9484 ( 0.1 %) |

Table S3: Energetics and structural properties of different magnetic orderings of  $\alpha$ - $CaV_2O_5$ . Values in brackets indicate the difference respect to the calculated lattice parameters for the FM case

| $\alpha$ - $CaV_2O_5$ | $\Delta E$ (eV/f.u.) | a (Å)           | b (Å)            | c (Å)           |
|-----------------------|----------------------|-----------------|------------------|-----------------|
| FM                    | 0.000                | 3.6029          | 11.2193          | 4.7800          |
| AFM1                  | -0.047               | 3.6026 ( 0.0 %) | 11.2304 ( 0.1 %) | 4.7667 (-0.3 %) |
| AFM2                  | -0.030               | 3.6059 ( 0.1 %) | 11.2188 ( 0.0 %) | 4.7686 (-0.2 %) |
| AFM3                  | -0.013               | 3.6008 (-0.1 %) | 11.2320 ( 0.1 %) | 4.7795 ( 0.0 %) |

Table S4: Energetics and structural properties of different magnetic orderings of  $\delta$ -CaV<sub>2</sub>O<sub>5</sub>. Values in brackets indicate the difference respect to the calculated lattice parameters for the FM case

| $\delta$ -CaV <sub>2</sub> O <sub>5</sub> | $\Delta E$ (eV/f.u.) | a (Å)           | b (Å)            | c (Å)            |
|-------------------------------------------|----------------------|-----------------|------------------|------------------|
| FM                                        | 0.000                | 3.7265          | 10.9595          | 11.1558          |
| AFM1                                      | -0.022               | 3.7275 ( 0.0 %) | 10.9664 ( 0.1 %) | 11.1467 (-0.1 %) |
| AFM2                                      | -0.004               | 3.7288 ( 0.1 %) | 10.9546 ( 0.0 %) | 11.1399 (-0.1 %) |
| AFM3                                      | -0.012               | 3.7291 ( 0.1 %) | 10.9533 (-0.1 %) | 11.1567 ( 0.0 %) |

### 3 Structural properties of $MV_2O_5$ phases

Table S5: Structural properties of  $\alpha$ - $MV_2O_5$ . Values in brackets indicate the expansion or contraction with respect to the calculated lattice parameters for the undoped  $V_2O_5$  phase

| M               | r (Å) | a (Å)         | b (Å)          | c (Å)          | Vol (Å <sup>3</sup> ) |
|-----------------|-------|---------------|----------------|----------------|-----------------------|
| No dopant       |       | 3.544         | 11.490         | 4.378          | 178.27                |
| Li <sup>+</sup> | 0.76  | 3.598 (+1.5%) | 11.091 (-3.5%) | 4.567 (+4.3 %) | 182.20 (+2.2 %)       |
| Be              | 0.45  | 3.584 (+1.1%) | 10.432 (-9.2%) | 4.707 (+7.5 %) | 175.98 (-1.3%)        |
| Fe (ls)         | 0.61  | 3.526 (-0.5%) | 11.099 (-3.4%) | 4.668 (+6.6 %) | 182.65 (+2.5 %)       |
| Mg              | 0.72  | 3.431 (-3.2%) | 11.198 (-2.5%) | 4.709 (+7.6 %) | 180.95 (+1.5 %)       |
| Zn              | 0.74  | 3.493 (-1.4%) | 11.255 (-2.0%) | 4.709 (+7.6 %) | 185.11 (+3.8 %)       |
| Fe (hs)         | 0.78  | 3.509 (-1.0%) | 11.156 (-2.9%) | 4.668 (+6.6 %) | 182.74 (+2.5 %)       |
| Cd              | 0.95  | 3.572 (+0.8%) | 11.303 (-1.6%) | 4.805 (+9.8 %) | 194.02 (+8.8 %)       |
| Ca              | 1.00  | 3.603 (+1.7%) | 11.219 (-2.4%) | 4.780 (+9.2 %) | 193.21 (+8.4 %)       |
| Sr              | 1.18  | 3.728 (+5.2%) | 11.175 (-2.7%) | 4.921 (+12.4%) | 204.99 (+15.0%)       |
| Ba              | 1.35  | 3.876 (+9.4%) | 10.850 (-5.6%) | 5.349 (+22.2%) | 224.94 (+26.2%)       |

Table S6: Structural properties of  $\delta$ - $MV_2O_5$ . Values in brackets indicate the expansion or contraction with respect to the calculated lattice parameters for the undoped  $V_2O_5$  phase

| M               | r (Å) | a (Å)         | b (Å)          | c (Å)           | Vol (Å <sup>3</sup> ) |
|-----------------|-------|---------------|----------------|-----------------|-----------------------|
| No dopant       |       | 3.559         | 11.356         | 9.375           | 378.940               |
| Li <sup>+</sup> | 0.76  | 3.615 (+1.6%) | 11.113 (-2.1%) | 9.669 (+3.1%)   | 388.441 (+2.5%)       |
| Be              | 0.45  | 3.296 (-7.4%) | 11.781 (+3.7%) | 9.251 (-1.3%)   | 359.220 (-5.2%)       |
| Fe (ls)         | 0.61  | 3.703 (+4.0%) | 10.769 (-5.2%) | 10.010 (+6.8%)  | 399.224 (+5.4%)       |
| Mg              | 0.72  | 3.667 (+3.0%) | 10.942 (-3.6%) | 9.909 (+5.7%)   | 397.602 (+4.9%)       |
| Zn              | 0.74  | 3.617 (+1.6%) | 11.193 (-1.4%) | 10.013 (+6.8%)  | 405.363 (+7.0%)       |
| Fe (hs)         | 0.78  | 3.678 (+3.3%) | 11.098 (-2.3%) | 10.065 (+7.4%)  | 410.856 (+8.4%)       |
| Cd              | 0.95  | 3.679 (+3.4%) | 11.311 (-0.4%) | 10.866 (+15.9%) | 452.172 (+19.3%)      |
| Ca              | 1.00  | 3.727 (+4.7%) | 11.156 (-1.8%) | 10.960 (+16.9%) | 455.616 (+20.2%)      |
| Sr              | 1.18  | 3.782 (+6.2%) | 11.053 (-2.7%) | 11.794 (+25.8%) | 492.939 (+30.1%)      |
| Ba              | 1.35  | 3.872 (+8.8%) | 10.642 (-6.3%) | 12.771 (+36.2%) | 526.198 (+38.9%)      |

## References

- [1] G. S. Gautam, P. Canepa, R. Malik, M. Liu, K. Persson and G. Ceder, *Chem. Commun.*, 2015, **51**, 13619–13622.
- [2] G. S. Gautam, P. Canepa, A. Abdellahi, A. Urban, R. Malik and G. Ceder, *Chem. Mater.*, 2015, **27**, 3733–3742.

- [3] Z. Rong, R. Malik, P. Canepa, G. S. Gautam, M. Liu, A. Jain, K. Persson and G. Ceder, *Chem. Mater.*, 2015, **27**, 6016–6021.
- [4] M. A. Korotin, V. I. Anisimov, T. Saha-Dasgupta and I. Dasgupta, *J. Phys. Condens. Matter*, 2000, **12**, 113–124.
